# Supplementary material for: Local Extinction and Unintentional Rewilding of Bighorn Sheep (Ovis canadensis) on a Desert Island
Source: PLOS journal article supplement (doi:10.1371/journal.pone.0091358), 2014-03-19
Supplement: S1 (10.1371/journal.pone.0091358.s001) [file journal.pone.0091358.s001]

a)

| Accession Number | Species                                    | 10                                    | 20                              | 30 | 40    |
|------------------|--------------------------------------------|---------------------------------------|---------------------------------|----|-------|
| AY903995         | <i>O. c. nelsoni</i> , haplotype B         | A G C G G G T T G T T G G T T T C A C | G C G G C A T G G T A G A T A A |    |       |
| AY904015         | <i>O. c. nelsoni</i> , haplotype V         | .                                     | .                               | .  | .     |
| AY903996         | <i>O. c. nelsoni</i> , haplotype C         | .                                     | .                               | .  | .     |
| AY904011         | <i>O. c. nelsoni</i> , haplotype R         | .                                     | .                               | .  | .     |
| AY904013         | <i>O. c. nelsoni</i> , haplotype T         | .                                     | .                               | .  | G     |
| AY116623         | <i>O. c. weemsi</i>                        | .                                     | .                               | .  | .     |
| AY116621         | <i>O. c. mexicana</i> , Tiburon-haplotype1 | .                                     | .                               | .  | C     |
| AY116622         | <i>O. c. mexicana</i> , Tiburon-haplotype2 | .                                     | .                               | .  | .     |
| AF010407         | <i>Ovis aries</i>                          | .                                     | .                               | .  | G A C |
| AY091499         | <i>Ovis aries</i>                          | .                                     | .                               | .  | G A C |
| KF769975         | Isla Tiburon aDNA                          | .                                     | N                               | .  | .     |
| AY091486         | <i>O. c. canadensis</i>                    | .                                     | .                               | .  | .     |

  

|                                            | 50                                          | 60                        | 70 |
|--------------------------------------------|---------------------------------------------|---------------------------|----|
| <i>O. c. nelsoni</i> , haplotype B         | G C T C G T G A T C T A G T G G A C A G G A | T A C G C A T G T T G A C |    |
| <i>O. c. nelsoni</i> , haplotype V         | .                                           | .                         | .  |
| <i>O. c. nelsoni</i> , haplotype C         | .                                           | .                         | .  |
| <i>O. c. nelsoni</i> , haplotype R         | .                                           | .                         | .  |
| <i>O. c. nelsoni</i> , haplotype T         | .                                           | G                         | .  |
| <i>O. c. weemsi</i>                        | .                                           | .                         | .  |
| <i>O. c. mexicana</i> , Tiburon-haplotype1 | .                                           | .                         | .  |
| <i>O. c. mexicana</i> , Tiburon-haplotype2 | .                                           | .                         | .  |
| <i>Ovis aries</i>                          | .                                           | G                         | T  |
| <i>Ovis aries</i>                          | .                                           | A                         | .  |
| Isla Tiburon aDNA                          | N N N N N N                                 | .                         | .  |
| <i>O. c. canadensis</i>                    | C                                           | G                         | .  |

  

|                                            | 80              |
|--------------------------------------------|-----------------|
| <i>O. c. nelsoni</i> , haplotype B         | T A G A A C G G |
| <i>O. c. nelsoni</i> , haplotype V         | .               |
| <i>O. c. nelsoni</i> , haplotype C         | .               |
| <i>O. c. nelsoni</i> , haplotype R         | .               |
| <i>O. c. nelsoni</i> , haplotype T         | .               |
| <i>O. c. weemsi</i>                        | .               |
| <i>O. c. mexicana</i> , Tiburon-haplotype1 | .               |
| <i>O. c. mexicana</i> , Tiburon-haplotype2 | .               |
| <i>Ovis aries</i>                          | G               |
| <i>Ovis aries</i>                          | A T             |
| Isla Tiburon aDNA                          | .               |
| <i>O. c. canadensis</i>                    | G G             |
